# Supplementary material for: Large-scale structure of brown rat ( Rattus norvegicus ) populations in England: effects on rodenticide resistance
Source: PeerJ journal article supplement (doi:10.7717/peerj.1458), 2015-12-07
Supplement: Haniza_et_al_2015_supporting_data.xlsx [file Haniza_et_al_2015_supporting_data.xlsx]

## Sheet: mtDNA
County	95	97	157	204	244	246	260	265	276	313
Berkshire	4	4	2	4	2	4	4	3	1	3
Berkshire	4	4	2	4	2	4	4	3	1	3
Berkshire	4	4	2	4	2	4	4	3	1	3
Berkshire	4	4	2	4	2	4	4	3	1	3
Berkshire	4	4	2	4	2	4	4	3	1	3
Berkshire	4	4	2	4	2	4	4	3	1	3
Berkshire	4	4	2	4	2	4	4	3	1	3
Berkshire	4	4	2	4	2	4	4	3	1	3
Berkshire	4	4	2	4	2	4	4	3	1	3
Berkshire	4	4	2	4	2	4	4	3	1	3
Berkshire	4	4	2	4	2	4	4	3	1	3
Berkshire	4	4	2	4	2	4	4	3	1	3
Berkshire	4	4	2	4	2	4	4	3	1	3
Berkshire	4	4	2	4	2	4	4	3	1	3
Berkshire	4	4	2	4	2	4	4	3	1	3
Berkshire	4	4	2	4	2	4	4	3	1	3
Berkshire	4	2	2	2	2	2	2	1	3	1
Berkshire	4	2	2	2	2	2	2	1	3	1
Berkshire	4	2	2	2	2	2	2	1	3	1
Berkshire	4	2	2	2	2	2	2	1	3	1
Berkshire	4	2	2	2	2	2	2	1	3	1
Berkshire	4	2	2	2	2	2	2	1	3	1
Berkshire	2	2	2	2	2	2	2	1	3	1
Berkshire	4	4	2	4	2	4	4	3	1	1
Berkshire	4	4	2	4	2	4	4	3	1	3
Cambridgeshire	4	4	2	4	2	4	4	3	1	3
Cambridgeshire	4	4	2	4	2	4	4	3	1	3
Cambridgeshire	4	4	2	4	2	4	4	3	1	3
Cambridgeshire	4	4	2	4	2	4	4	3	1	3
Cambridgeshire	4	4	2	4	2	4	4	3	1	3
Cambridgeshire	4	4	2	4	2	4	4	3	1	3
Cambridgeshire	4	4	2	4	2	4	4	3	1	3
Cambridgeshire	4	4	2	4	2	4	4	3	1	3
Cambridgeshire	4	4	2	4	2	4	4	3	1	3
Cambridgeshire	4	4	2	4	2	4	4	3	1	3
Cambridgeshire	4	4	2	4	2	4	4	3	1	3
Cambridgeshire	4	4	2	4	2	4	4	3	1	3
Cambridgeshire	4	4	2	4	2	4	4	3	1	3
Cambridgeshire	4	4	2	4	2	4	4	3	1	3
Cambridgeshire	4	4	2	4	2	4	4	3	1	3
Cambridgeshire	4	4	2	4	2	4	4	3	1	3
Cambridgeshire	4	4	2	4	2	4	4	3	1	3
Cambridgeshire	4	4	2	4	2	4	4	3	1	3
Cambridgeshire	4	2	2	2	2	2	2	1	3	1
Cambridgeshire	4	2	2	2	2	2	2	1	3	1
Cambridgeshire	4	2	2	2	2	2	4	1	3	1
Dorset	4	2	2	2	2	2	2	1	3	1
Dorset	4	2	2	2	2	2	2	1	3	1
Dorset	4	2	2	2	2	2	2	1	3	1
Dorset	4	2	2	2	2	2	2	1	3	1
Dorset	4	2	2	2	2	2	2	1	3	1
Dorset	4	2	2	2	2	2	2	1	3	1
Dorset	4	2	2	2	2	2	2	1	3	1
Gloucestershire	4	4	2	4	2	4	4	3	1	3
Gloucestershire	4	4	2	4	2	4	4	3	1	3
Gloucestershire	4	2	2	2	2	2	2	1	3	1
Hampshire	4	4	2	4	2	4	4	3	1	3
Hampshire	4	4	2	4	2	4	4	3	1	3
Hampshire	4	4	2	4	2	4	4	3	1	3
Hampshire	4	4	2	4	2	4	4	3	1	3
Hampshire	4	4	2	4	2	4	4	3	1	3
Hampshire	4	4	2	4	2	4	4	3	1	3
Hampshire	4	4	2	4	2	4	4	3	1	3
Hampshire	4	4	2	4	2	4	4	3	1	3
Hampshire	4	4	2	4	2	4	4	3	1	3
Kent	4	4	2	4	2	4	4	3	1	3
Kent	4	4	2	4	2	4	4	3	1	3
Kent	4	4	2	4	2	4	4	3	1	3
Kent	4	2	2	2	2	2	2	1	3	1
Kent	4	2	2	2	2	2	2	1	3	1
Kent	4	2	2	2	2	2	2	1	3	1
Kent	4	2	2	2	2	2	2	1	3	1
Leicestershire	4	4	2	4	2	4	4	3	1	3
Leicestershire	4	4	2	4	2	4	4	3	1	3
Leicestershire	4	4	2	4	2	4	4	3	1	3
Leicestershire	4	4	2	4	2	4	4	3	1	3
Leicestershire	4	4	2	4	2	4	4	3	1	3
Leicestershire	4	4	2	4	2	4	4	3	1	3
Leicestershire	4	4	2	4	2	4	4	3	1	3
Leicestershire	4	4	2	4	2	4	4	3	1	3
Leicestershire	4	4	2	4	2	4	4	3	1	3
Leicestershire	4	4	2	4	2	4	4	3	1	3
Leicestershire	4	4	2	4	2	4	4	3	1	3
Leicestershire	4	4	2	4	2	4	4	3	1	3
Leicestershire	4	4	2	4	2	4	4	3	1	3
Leicestershire	4	4	2	4	2	4	4	3	1	3
Leicestershire	4	4	2	4	2	4	4	3	1	3
Leicestershire	4	4	2	4	2	4	4	3	1	3
Leicestershire	4	4	2	4	2	4	4	3	1	3
Leicestershire	4	4	2	4	2	4	4	3	1	3
Leicestershire	4	4	2	4	2	4	4	3	1	3
Leicestershire	4	4	2	4	2	4	4	3	1	3
Leicestershire	4	4	2	4	2	4	4	3	1	3
Leicestershire	4	4	2	4	2	4	4	3	1	3
Leicestershire	4	4	2	4	2	4	4	3	1	3
Leicestershire	4	4	2	4	2	4	4	3	1	3
Leicestershire	4	4	2	4	2	4	4	3	1	3
Leicestershire	4	4	2	4	2	4	4	3	1	3
Leicestershire	4	4	2	4	2	4	4	3	1	3
Leicestershire	4	4	2	4	2	4	4	3	1	3
Leicestershire	4	4	2	4	2	4	4	3	1	3
Leicestershire	4	4	2	4	2	4	4	3	1	3
Leicestershire	4	4	2	4	2	4	4	3	1	3
Leicestershire	4	4	2	4	2	4	4	3	1	3
Leicestershire	4	4	2	4	2	4	4	3	1	3
Leicestershire	4	4	2	4	2	4	4	3	1	3
Leicestershire	4	4	2	4	2	4	4	3	1	3
Middlesex	4	4	2	4	2	4	4	3	1	3
Middlesex	4	4	2	4	2	4	4	3	1	3
Middlesex	4	4	2	4	2	4	4	3	1	3
Oxfordshire	4	4	2	4	2	4	4	3	1	3
Oxfordshire	4	4	2	4	2	4	4	3	1	3
Oxfordshire	4	4	2	4	2	4	4	3	1	3
Oxfordshire	4	4	2	4	2	4	4	3	1	3
Oxfordshire	4	2	2	2	2	2	2	1	3	1
Oxfordshire	4	2	2	2	2	2	2	1	3	1
Oxfordshire	4	2	2	2	2	2	2	1	3	1
Oxfordshire	4	2	2	2	2	2	2	1	3	1
Oxfordshire	4	2	2	2	2	2	2	1	3	1
Oxfordshire	4	2	2	2	2	2	2	1	3	1
Salop	4	2	2	2	2	2	2	1	3	1
Salop	4	2	2	2	2	2	2	1	3	1
Salop	4	2	2	2	2	2	2	1	3	1
Salop	4	2	4	2	4	2	4	1	3	1
Sussex	4	4	2	4	2	4	4	3	1	3
Sussex	4	4	2	4	2	4	4	3	1	3
Sussex	4	4	2	4	2	4	4	3	1	3
Sussex	4	4	2	4	2	4	4	3	1	3
Sussex	4	4	2	4	2	4	4	3	1	3
Sussex	4	4	2	4	2	4	4	3	1	3
Sussex	4	4	2	4	2	4	4	3	1	3
Sussex	4	4	2	4	2	4	4	3	1	3
Sussex	4	4	2	4	2	4	4	3	1	3
Sussex	4	2	2	2	2	2	2	1	3	1
Sussex	4	2	2	2	2	2	2	1	3	1
Sussex	4	2	2	2	2	2	2	1	3	1
Welshpool	4	4	2	4	2	4	4	3	1	3
Welshpool	4	2	2	2	2	2	2	1	3	1
Wiltshire	4	4	2	4	2	4	4	3	1	3
Wiltshire	4	4	2	4	2	4	4	3	1	3
Wiltshire	4	4	2	4	2	4	4	3	1	3
Wiltshire	4	4	2	4	2	4	4	3	1	3
Wiltshire	4	4	2	4	2	4	4	3	1	3
Wiltshire	4	4	2	4	2	4	4	3	1	3
Wiltshire	4	4	2	4	2	4	4	3	1	3
Wiltshire	4	4	2	4	2	4	4	3	1	3
Wiltshire	4	4	2	4	2	4	4	3	1	3
Wiltshire	4	4	2	4	2	4	4	3	1	3
Wiltshire	4	4	2	4	2	4	4	3	1	3
Wiltshire	4	4	2	4	2	4	4	3	1	3
Wiltshire	4	4	2	4	2	4	4	3	1	3
Wiltshire	4	4	2	4	2	4	4	3	1	3
Wiltshire	4	2	2	2	2	2	2	1	3	1
Wiltshire	4	2	2	2	2	2	2	1	3	1
Wiltshire	4	4	2	4	2	4	4	3	1	3
Wiltshire	4	2	2	2	2	2	4	1	3	1
Worcestershire	4	4	2	4	2	4	4	3	1	3
Worcestershire	4	4	2	4	2	4	4	3	1	3
Worcestershire	4	4	2	4	2	4	4	3	1	3
Worcestershire	4	4	2	4	2	4	4	3	1	3
Worcestershire	4	2	4	2	4	2	4	1	3	1
Yorkshire	4	4	2	4	2	4	4	3	1	3
Yorkshire	4	4	2	4	2	4	4	3	1	3
Yorkshire	4	4	2	4	2	4	4	3	1	3
Yorkshire	4	4	2	4	2	4	4	3	1	3
Yorkshire	4	4	2	4	2	4	4	3	1	3
Yorkshire	4	4	2	4	2	4	4	3	1	3
Yorkshire	4	4	2	4	2	4	4	3	1	3
Yorkshire	4	4	2	4	2	4	4	3	1	3
Yorkshire	4	4	2	4	2	4	4	3	1	3
Yorkshire	4	4	2	4	2	4	4	3	1	3
Yorkshire	4	2	2	2	2	2	2	1	3	1
Yorkshire	4	2	2	2	2	2	2	1	3	1
Yorkshire	4	2	2	2	2	2	2	1	3	1
Yorkshire	4	2	2	2	2	2	2	1	3	1
Yorkshire	4	2	2	2	2	2	2	1	3	1
Yorkshire	4	2	2	2	2	2	2	1	3	1
Yorkshire	4	2	2	2	2	2	2	1	3	1
Yorkshire	4	2	2	2	2	2	2	1	3	1
Yorkshire	4	2	2	2	2	2	2	1	3	1
Yorkshire	4	2	2	2	2	2	2	1	3	1
Yorkshire	4	2	2	2	2	2	2	1	3	1
Yorkshire	4	2	2	2	2	2	2	1	3	1
Yorkshire	4	2	2	2	2	2	2	1	3	1
Yorkshire	4	2	2	2	2	2	2	1	3	1

## Sheet: microsatellites
County	D17		D3		D5		D12		D14		D8
Berkshire	204	204	94	102	122	142	264	314	142	154	206	208
Berkshire	384	386	90	94	142	152	258	322	142	156	212	214
Berkshire	228	228	94	100	102	142	258	258	142	154	214	218
Berkshire	398	398	86	96	152	152	244	314	148	148	204	204
Berkshire	204	204	86	96	102	152	246	312	148	148	202	208
Berkshire	384	386	92	100	152	152	258	314	146	146	212	212
Berkshire	204	204	86	86	152	152	308	308	150	154	206	210
Berkshire	204	204	86	90	102	102	246	318	150	154	206	206
Berkshire	204	204	86	100	102	152	254	308	140	154	208	208
Berkshire	204	204	86	96	142	142	312	320	146	160	196	216
Berkshire	204	204	88	98	102	142	244	312	148	150	212	212
Berkshire	384	386	94	100	142	142	316	316	140	156	210	210
Berkshire	204	204	100	100	152	152	256	258	140	154	210	216
Berkshire	384	386	92	98	102	102	258	312	156	156	208	214
Berkshire	398	398	88	88	102	102	258	312	152	156	206	216
Berkshire	380	380	94	100	142	152	246	308	140	152	206	206
Berkshire	204	204	94	94	142	152	244	308	154	156	208	210
Berkshire	228	386	94	94	102	102	246	258	156	156	208	216
Berkshire	222	226	92	94	102	142	246	246	156	156	202	210
Berkshire	204	204	86	94	122	122	246	314	148	150	202	202
Berkshire	226	226	86	100	102	102	246	322	142	148	210	210
Berkshire	228	380	86	94	142	152	308	314	152	156	210	220
Berkshire	204	228	96	98	142	146	260	308	142	156	204	220
Berkshire	204	204	92	92	142	142	314	324	154	154	214	214
Berkshire	384	384	86	94	102	102	256	322	152	152	204	210
Cambridgeshire	204	228	100	100	142	142	256	324	152	154	200	218
Cambridgeshire	204	228	86	100	142	156	256	256	152	156	216	216
Cambridgeshire	204	204	86	100	142	156	258	258	154	156	216	216
Cambridgeshire	204	204	86	100	156	156	260	260	152	152	216	218
Cambridgeshire	204	228	100	100	140	142	258	262	154	156	216	218
Cambridgeshire	204	204	92	96	142	158	314	322	154	154	218	220
Cambridgeshire	204	204	86	94	152	158	256	326	152	154	200	216
Cambridgeshire	204	204	76	96	102	142	316	322	154	158	208	220
Cambridgeshire	204	204	76	96	102	142	256	256	150	154	200	216
Cambridgeshire	204	386	86	96	102	156	256	314	152	154	216	220
Cambridgeshire	204	204	86	98	142	156	314	314	140	152	206	212
Cambridgeshire	204	204	86	92	102	142	314	322	154	154	208	208
Cambridgeshire	204	204	94	96	142	156	244	246	152	152	202	216
Cambridgeshire	204	204	86	94	152	156	256	308	150	154	216	218
Cambridgeshire	204	204	92	94	102	102	256	314	152	154	216	218
Cambridgeshire	204	204	86	94	142	142	256	308	150	154	214	214
Cambridgeshire	204	204	86	94	142	142	246	308	154	154	204	218
Cambridgeshire	204	228	86	94	142	156	244	314	152	152	216	218
Cambridgeshire	226	400	76	86	102	156	244	256	140	152	206	206
Cambridgeshire	204	228	86	86	102	152	308	322	152	152	198	198
Cambridgeshire	204	228	90	98	102	142	308	322	150	150	208	214
Dorset	204	204	98	98	122	156	244	256	154	160	206	212
Dorset	226	228	86	102	122	142	256	256	150	150	212	216
Dorset	200	200	98	98	122	156	244	246	160	160	212	214
Dorset	202	226	84	86	102	152	320	320	152	152	212	214
Dorset	204	384	86	92	102	122	256	256	150	156	206	212
Dorset	200	226	98	100	152	152	244	244	154	156	202	212
Dorset	204	226	86	96	122	152	244	322	152	154	206	216
Hampshire	382	386	78	84	142	142	258	258	140	154	212	218
Hampshire	382	386	78	86	102	142	256	314	142	156	210	210
Hampshire	202	204	78	98	102	142	256	312	152	152	206	210
Hampshire	382	386	78	84	142	142	308	314	142	142	214	214
Hampshire	202	226	90	90	102	102	246	258	142	156	210	210
Hampshire	382	386	90	90	102	102	256	314	142	150	210	218
Hampshire	226	384	86	90	102	142	258	318	140	140	210	214
Hampshire	204	204	78	90	102	142	314	314	142	154	210	212
Hampshire	204	204	78	86	102	102	314	314	154	156	210	210
Kent	202	204	92	98	102	102	314	316	140	148	208	208
Kent	204	204	90	102	102	142	244	244	142	142	212	212
Kent	384	386	94	98	102	142	262	322	154	156	202	214
Kent	382	398	92	98	102	102	256	256	140	156	202	214
Kent	384	386	94	98	102	102	264	312	142	150	210	212
Kent	398	400	96	102	102	142	258	264	152	154	220	220
Kent	204	204	94	102	102	102	264	314	152	154	210	220
Kent	204	226	102	102	102	142	244	244	142	148	208	218
Leicestershire	204	204	86	94	102	142	314	316	154	156	200	204
Leicestershire	386	386	96	96	102	102	314	314	156	156	204	214
Leicestershire	204	204	92	94	98	142	244	316	142	152	214	220
Leicestershire	204	204	92	94	142	142	308	314	152	154	208	216
Leicestershire	204	204	86	88	102	154	308	312	148	150	208	214
Leicestershire	228	228	86	96	102	142	246	326	156	158	204	210
Leicestershire	204	204	76	76	154	154	312	314	152	156	208	214
Leicestershire	228	228	76	86	102	142	244	314	144	154	210	220
Leicestershire	204	204	86	96	102	142	314	314	148	156	196	216
Leicestershire	204	204	86	96	142	152	244	316	142	152	212	214
Leicestershire	204	228	92	94	142	142	314	326	144	148	214	214
Leicestershire	396	398	86	94	102	142	308	314	144	156	212	216
Leicestershire	204	228	92	94	142	154	246	314	148	158	200	206
Leicestershire	228	380	86	86	102	154	314	314	148	148	210	210
Leicestershire	204	204	86	94	102	142	246	258	148	156	208	210
Leicestershire	204	204	94	94	142	142	244	314	142	152	204	204
Leicestershire	228	228	92	96	142	142	324	324	154	164	200	210
Leicestershire	204	204	96	96	102	102	256	258	146	150	198	208
Leicestershire	228	386	76	96	102	142	256	258	144	148	214	216
Leicestershire	204	204	76	86	102	140	256	314	152	154	216	220
Leicestershire	204	204	86	86	142	142	308	314	154	154	208	208
Leicestershire	384	386	86	92	102	142	308	314	142	144	204	210
Leicestershire	396	398	86	90	102	102	246	246	142	152	208	216
Leicestershire	204	204	92	92	102	152	314	314	148	150	206	212
Leicestershire	204	204	90	92	102	142	314	314	142	142	202	204
Leicestershire	384	386	86	92	102	102	312	314	148	150	212	212
Leicestershire	384	386	86	96	102	142	308	314	142	154	204	208
Leicestershire	222	222	96	96	102	102	308	312	148	148	208	214
Leicestershire	386	386	86	92	102	152	244	312	142	150	208	212
Leicestershire	204	204	90	94	142	142	244	312	156	156	206	210
Leicestershire	380	384	86	90	142	142	314	314	150	154	220	220
Leicestershire	228	228	86	86	102	154	314	314	150	154	214	214
Leicestershire	204	204	86	92	142	154	314	314	140	156	206	206
Leicestershire	204	226	84	86	102	142	244	314	142	150	202	206
Leicestershire	398	398	76	94	142	142	308	314	140	154	200	214
Oxfordshire	226	226	88	98	102	142	242	244	150	150	206	208
Oxfordshire	384	386	86	94	102	142	314	314	150	152	206	212
Oxfordshire	380	386	88	98	102	142	244	308	148	152	208	210
Oxfordshire	226	228	86	92	102	102	254	254	150	150	212	212
Oxfordshire	226	226	92	94	142	142	256	256	140	146	200	212
Oxfordshire	386	386	92	92	102	102	242	242	146	154	210	214
Oxfordshire	386	396	92	92	102	142	244	258	142	152	220	220
Oxfordshire	226	228	92	100	102	102	246	258	156	156	208	216
Oxfordshire	228	228	92	94	102	102	264	264	148	152	200	200
Oxfordshire	204	204	98	98	142	142	254	308	140	154	208	216
Salop	204	226	84	86	102	152	254	308	142	154	206	206
Salop	204	204	86	94	142	142	256	256	150	150	202	210
Salop	204	204	86	94	142	156	256	256	160	160	214	214
Salop	384	386	94	96	142	142	256	324	150	156	202	208
Salop	204	204	96	96	102	102	318	318	152	156	210	210
Salop	204	204	76	98	98	152	244	314	142	156	210	212
Sussex	204	204	100	100	102	142	314	322	142	142	218	222
Sussex	204	204	102	102	152	152	244	244	142	164	206	206
Sussex	204	204	98	98	142	152	314	324	142	142	204	204
Sussex	204	228	96	102	102	102	246	314	144	152	212	214
Sussex	204	204	86	94	142	142	258	324	142	148	204	204
Sussex	202	202	96	102	142	142	258	314	142	150	216	218
Sussex	396	398	94	100	142	142	316	316	148	150	212	218
Sussex	204	228	94	100	142	146	258	320	150	150	210	214
Sussex	204	204	96	102	142	142	312	312	142	150	214	214
Sussex	396	398	86	94	142	142	314	316	142	148	212	214
Sussex	384	386	94	100	152	152	256	314	142	156	210	214
Wiltshire	204	204	86	86	102	102	244	244	140	152	206	212
Wiltshire	204	204	86	86	102	152	244	258	142	150	206	206
Wiltshire	204	204	94	102	102	146	244	246	142	152	206	206
Wiltshire	204	204	82	94	102	152	244	256	142	142	212	212
Wiltshire	204	204	94	94	152	152	258	312	156	156	208	216
Wiltshire	204	204	86	102	102	152	318	318	152	156	212	212
Wiltshire	200	200	76	76	152	152	244	246	152	152	204	214
Wiltshire	384	386	86	100	102	152	244	314	142	152	208	218
Wiltshire	204	204	86	94	152	152	244	308	142	148	206	206
Wiltshire	226	226	86	96	142	152	244	316	154	154	210	212
Wiltshire	226	226	86	86	102	152	246	316	152	156	210	210
Wiltshire	204	204	76	94	142	142	244	316	142	154	208	210
Wiltshire	226	226	86	96	102	152	244	246	152	156	210	212
Wiltshire	384	386	86	94	102	154	314	326	152	154	210	212
Wiltshire	380	384	80	86	102	142	244	256	152	156	208	212
Wiltshire	200	204	76	90	102	142	258	264	152	154	220	222
Wiltshire	204	204	86	100	102	142	244	244	142	142	208	210
Wiltshire	204	204	80	100	102	102	244	318	154	154	210	210
Worcestershire	386	398	86	88	142	142	244	316	154	154	210	210
Worcestershire	384	386	86	94	102	102	244	316	142	152	214	218
Worcestershire	398	398	76	86	102	102	314	326	142	160	204	204
Worcestershire	398	398	86	90	102	102	314	314	142	142	212	212
Worcestershire	384	386	76	94	142	142	258	326	152	152	208	208
Yorkshire	202	202	94	100	142	142	320	320	142	150	206	208
Yorkshire	202	204	76	90	152	152	244	320	154	154	210	212
Yorkshire	202	202	94	94	142	142	314	320	140	154	206	218
Yorkshire	398	400	96	102	102	142	258	314	146	146	210	210
Yorkshire	204	204	86	94	152	152	316	316	150	160	204	204
Yorkshire	204	204	94	94	102	142	244	322	150	152	216	218
Yorkshire	204	204	76	86	102	102	308	322	146	150	210	214
Yorkshire	202	204	76	86	102	102	256	316	160	160	208	216
Yorkshire	204	204	76	86	142	142	244	258	150	150	206	214
Yorkshire	200	202	94	94	152	152	244	322	152	152	210	218
Yorkshire	222	222	76	86	142	152	314	314	148	150	204	214
Yorkshire	204	204	76	94	142	142	312	322	154	154	202	220
Yorkshire	204	204	86	92	152	152	246	308	154	154	204	216
Yorkshire	204	228	76	88	142	142	244	256	140	152	206	208
Yorkshire	204	204	86	94	142	152	258	322	140	146	216	218
Yorkshire	204	228	96	98	142	142	244	244	142	150	206	206
Yorkshire	384	386	88	94	142	142	244	320	140	152	204	208
Yorkshire	204	386	76	90	142	142	256	258	146	150	198	208
Yorkshire	204	204	94	94	142	142	256	322	152	152	208	208
Yorkshire	386	386	76	76	142	152	256	256	160	160	206	218
Yorkshire	386	386	76	90	102	142	258	322	152	154	216	218
Yorkshire	386	386	92	100	142	152	314	316	142	148	212	212
Yorkshire	204	204	76	86	122	154	316	322	154	158	210	222
Yorkshire	204	204	76	94	102	154	256	314	144	154	206	220

## Sheet: exon 3 mutation
County	Animal I.D	Tyr139Cys (ARMS)	Leu120Gln (Stu1)	Leu128Gln (Bsr1)	Tyr139Ser (Mnl1)
Berkshire	"13B	1	0	0	0
Berkshire	"22B	1	0	0	0
Berkshire	"242B	1	1	0	0
Berkshire	"243B	1	0	0	0
Berkshire	"253B	0	0	0	0
Berkshire	"276B	1	0	0	0
Berkshire	"290B	1	1	0	0
Berkshire	"293B	1	0	0	0
Berkshire	"309B	1	1	0	0
Berkshire	"38B	1	0	0	0
Berkshire	"39B	0	1	0	0
Berkshire	"3B	1	0	0	0
Berkshire	"45B	1	0	0	0
Berkshire	"48B	1	0	0	0
Berkshire	"49B	1	0	0	0
Berkshire	"50B	1	0	0	0
Berkshire	"52B	1	0	0	0
Berkshire	"55B	1	0	0	0
Berkshire	"57B	1	0	0	0
Berkshire	"64B	1	1	0	0
Berkshire	"6B	0	0	0	0
Berkshire	"883A	0	0	0	0
Berkshire	"957A	1	0	0	0
Berkshire	"991A	1	1	0	0
Berkshire	"Z909	1	0	0	0
Cambridgeshire	LtS	1	0	0	0
Cambridgeshire	LW1	1	0	0	0
Cambridgeshire	FUL1	0	0	0	0
Cambridgeshire	FUL4	0	0	0	0
Cambridgeshire	FUL6	1	0	0	0
Cambridgeshire	FUL7	0	0	0	0
Cambridgeshire	"66B	1	0	0	0
Cambridgeshire	"69B	1	0	0	0
Cambridgeshire	"70B	1	0	0	0
Cambridgeshire	"76B	1	0	0	0
Cambridgeshire	"81B	1	0	0	0
Cambridgeshire	B1	1	0	0	0
Cambridgeshire	BAB2	1	0	0	0
Cambridgeshire	B3	1	0	0	0
Cambridgeshire	B4	0	0	0	0
Cambridgeshire	B5	0	0	0	0
Cambridgeshire	B6	0	0	0	0
Cambridgeshire	B7	1	0	0	0
Cambridgeshire	FUL2	0	0	0	0
Cambridgeshire	LW2	0	0	0	0
Cambridgeshire	SW1	1	0	0	0
Dorset	"333B	0	0	0	0
Dorset	"337B	1	0	0	0
Dorset	"339B	1	0	0	0
Dorset	"780A	1	0	0	0
Dorset	"781A	0	0	0	0
Dorset	"792A	1	0	0	0
Dorset	"797A	0	0	0	0
Gloucestershire	"189B	1	0	0	0
Gloucestershire	"191B	1	0	0	0
Gloucestershire	"193B	1	1	0	0
Greater London	"825A	0	0	0	0
Greater London	"829A	1	0	0	0
Greater London	"830A	1	0	0	0
Hampshire	"Z842	0	0	0	0
Hampshire	"Z851	1	0	0	0
Hampshire	"Z856	1	1	0	1
Hampshire	"Z860	0	1	0	0
Hampshire	"Z864	1	1	0	0
Hampshire	"Z865	0	0	0	0
Hampshire	"Z869	1	1	0	0
Hampshire	"Z870	0	1	0	1
Hampshire	"Z873	1	1	0	0
Kent	"101B	0	0	0	0
Kent	"103B	0	0	0	0
Kent	"109B	0	0	0	0
Kent	"111B	1	0	0	0
Kent	"112B	1	0	0	0
Kent	"92B	1	0	0	0
Kent	"94B	1	0	0	0
Leicester	F10-2	1	0	0	0
Leicester	F1-1	0	0	0	0
Leicester	F11-1	0	0	0	0
Leicester	F11-2/3	1	0	0	0
Leicester	F11-5/6	1	0	0	0
Leicester	F1-1A	0	0	0	0
Leicester	F1-3	1	0	0	0
Leicester	F1-3	0	0	0	0
Leicester	F1-4	0	0	0	0
Leicester	F1-5	0	0	0	0
Leicester	F1-6	0	0	0	0
Leicester	F1-6A	0	0	0	0
Leicester	F2-2	1	0	0	0
Leicester	F2-4	1	0	0	0
Leicester	F3-1	0	0	0	0
Leicester	F3-2	0	0	0	0
Leicester	F3-2	1	0	0	0
Leicester	F3-3	1	0	0	0
Leicester	F3-5	0	0	0	0
Leicester	F3-6	0	0	0	0
Leicester	F4-1	1	0	0	0
Leicester	F4-1	1	0	0	0
Leicester	F4-2	1	0	0	0
Leicester	F4-5	0	0	0	0
Leicester	F4-5/6	0	0	0	0
Leicester	F4-6	0	0	0	0
Leicester	F5-3	0	0	0	0
Leicester	F5-4	1	0	0	0
Leicester	F5-5/6	0	0	0	0
Leicester	F5-6	1	0	0	0
Leicester	F6-1	0	0	0	0
Leicester	F6-4	0	0	0	0
Leicester	F7-3	1	0	0	0
Leicester	HF	1	0	0	0
Leicester	LD	1	0	0	0
North Yorkshire	T10	1	0	0	0
North Yorkshire	T10	0	0	0	0
North Yorkshire	T11	0	0	0	0
North Yorkshire	T11	1	0	0	1
North Yorkshire	T2	1	0	0	1
North Yorkshire	T2	1	0	0	0
North Yorkshire	T2	1	0	0	0
North Yorkshire	T2	0	0	0	0
North Yorkshire	T2	0	0	0	0
North Yorkshire	T2	0	0	0	0
North Yorkshire	T3	1	0	0	0
North Yorkshire	T3a	0	1	0	0
North Yorkshire	T4	0	0	0	0
North Yorkshire	T4	0	0	0	0
North Yorkshire	T4	1	0	0	0
North Yorkshire	T4	0	0	0	0
North Yorkshire	T5	1	0	0	0
North Yorkshire	T5	1	0	0	0
North Yorkshire	T7	1	0	0	0
North Yorkshire	T7	0	0	0	0
North Yorkshire	T7	0	0	0	0
North Yorkshire	T7	0	0	0	0
North Yorkshire	T7	0	0	0	0
North Yorkshire	T8	0	0	0	0
Oxfordshire	"216B	1	0	0	0
Oxfordshire	"217B	0	0	0	0
Oxfordshire	"220B	1	0	0	0
Oxfordshire	"221B	1	0	0	0
Oxfordshire	"815A	1	0	0	0
Oxfordshire	"816A	0	0	0	0
Oxfordshire	"818A	1	1	0	0
Oxfordshire	"924A	1	0	0	0
Oxfordshire	"930A	1	0	0	0
Oxfordshire	"940A	1	0	0	0
Salop	"191A	1	0	0	0
Salop	"202B	1	0	0	1
Salop	"204B	1	0	0	1
Salop	"213B	1	0	0	0
Sussex	"120B	1	0	0	0
Sussex	"121B	1	0	0	0
Sussex	"122B	1	0	0	0
Sussex	"131B	1	0	0	0
Sussex	"146B	1	1	0	0
Sussex	"156B	1	1	0	0
Sussex	"159B	1	0	0	0
Sussex	"162B	1	0	0	0
Sussex	"165B	0	1	0	0
Sussex	"171B	1	0	0	0
Sussex	"181B	1	0	0	0
Welshpool	"737A	1	0	0	0
Welshpool	"739A	0	0	0	0
Wiltshire	"135B	1	0	0	0
Wiltshire	"139B	0	1	0	0
Wiltshire	"24A	1	0	0	0
Wiltshire	"27A	1	0	0	0
Wiltshire	"28A	1	0	0	0
Wiltshire	"319B	0	0	0	0
Wiltshire	"321B	1	0	0	0
Wiltshire	"331B	1	0	0	0
Wiltshire	"332B	1	0	0	0
Wiltshire	"39A	0	0	0	0
Wiltshire	"43A	1	0	0	0
Wiltshire	"46A	0	0	0	0
Wiltshire	"71A	1	0	0	0
Wiltshire	"75A	0	1	0	0
Wiltshire	"Z917	0	0	0	0
Wiltshire	"Z918	0	0	0	0
Wiltshire	"Z922	1	0	0	0
Wiltshire	"Z934	1	0	0	0
Worcestershire	"907A	1	0	0	0
Worcestershire	"909A	1	0	0	0
Worcestershire	"913A	1	0	0	0
Worcestershire	"914A	1	0	0	0
Worcestershire	"917A	1	0	0	0
